# Supplementary material
Source: PubMed Central journal article supplement (PMC3405629)
Supplement: supp_50.7.2229_JCM-JCM00808-12-s02.pdf [file supp_50.7.2229_JCM-JCM00808-12-s02.pdf]

**Supplementary Table 1.** DNA sequences of the primers and probes used to detect *kdr* mutations in body lice.

| Primer or probe  | Sequence                                                   | Exon and a.a. position <sup>a</sup> |
|------------------|------------------------------------------------------------|-------------------------------------|
| Seq1 F (forward) | ACCCATTCGTCGAATTATTCATAACT                                 | exon 1<br><br>M815I                 |
| Seq1 A (reverse) | CCCCGCATTAATAAATTTTAC                                      |                                     |
| Seq1 mut         | TCTGTCCATGTCTTTATCC <u>AT</u> GTC- <b>FL</b> <sup>b</sup>  |                                     |
| Anchor Seq1      | <b>LC-640</b> -TGATGATCCAAAGCCATAAATAGTGTGTT- <b>P</b>     |                                     |
| Seq2 S (forward) | TTTTTTCTTTTATGACGAAAC                                      | exon 3<br><br>T917I<br>and<br>L920F |
| Seq2 A (reverse) | CCCGTGTAATTTTTCCA                                          |                                     |
| Anchor 1         | AATTTCAATTATGGGTCGAACTGTTGG- <b>FL</b>                     |                                     |
| Sensor 1 C       | <b>LC-640</b> -GCTTTGGGTAATTTAA <u>C</u> ATTCGTC- <b>P</b> |                                     |
| Sensor 2 C       | ATTCGTC <u>CTT</u> TGCATTATCATATTCAT- <b>FL</b>            |                                     |
| Anchor 2         | <b>LC-640</b> -TTTGCCGTTATGGGAATGCAACTT- <b>P</b>          |                                     |

LC-Red 640 and fluorescein are fluorophores. The 3' end of the one of the two probes in each pair was phosphorylated to prevent probe elongation by Taq polymerase during the PCR.

Bold, codons; underlined, mutated bases.

<sup>a</sup>The amino acids are numbered according to GenBank accession no. AY191155

<sup>b</sup>**FL**, fluorescein; **LC-Red 640**, LightCycler-Red 640; **P**, phosphorylated.

**Supplementary Table 2.** Programs for real-time PCR to detect *kdr* mutations using the LightCycler apparatus 480.

| Mutations | Primers     | Size   | LightCycler <sup>®</sup> 480 Program |                  |               |
|-----------|-------------|--------|--------------------------------------|------------------|---------------|
|           |             |        | Denaturation                         | Amplification    | Melting       |
| M815I     | Seq1F/Seq1A | 144 bp |                                      | 95 °C; 01 sec    | 95 °C; 1 sec  |
|           |             |        |                                      | 60 °C; 10 sec    | 40 °C; 30 sec |
|           |             |        |                                      | 72 °C; 06 sec    | 80 °C;        |
| T917I     | Seq2S/Seq2A | 203 bp | 95 °C; 15 min                        | 95 °C; 01 sec    | continuous    |
| and or    |             |        | 51 °C; 15 sec                        | transition rate: |               |
| L920F     |             |        | 72 °C; 10 sec                        | 0.1 °C/sec       |               |
